# Supplementary material for: Endothelial progenitor cells improve the therapeutic effect of mesenchymal stem cell sheets on irradiated bone defect repair in a rat model
Source: PubMed Central journal article supplement (PMC5964689; doi:10.1186/s12967-018-1517-4), 2018-05-22
Supplement: 12967_2018_1517_MOESM3_ESM.pdf [file 12967_2018_1517_MOESM3_ESM.pdf]

**Table S1**

BV/TV (%) of the micro-CT evaluation

|      | non-irradiated |            | irradiated |            |
|------|----------------|------------|------------|------------|
|      | 4W             | 8W         | 4W         | 8W         |
| +EPC | 21.77±0.91     | 28.82±2.84 | 36.59±2.59 | 42.11±1.46 |
| BMSC | 23.40±1.25     | 27.61±2.23 | 20.7±1.78  | 29.28±2.58 |
| CTR  | 21.82±2.41     | 25.49±2.14 | 17.57±2.81 | 24.65±1.57 |

Results are expressed as mean ± SD and n = 4 per group

**Table S2**

P value of comparison of BV/TV

|                                    | non-irradiated |          | irradiated |          |
|------------------------------------|----------------|----------|------------|----------|
|                                    | 4W             | 8W       | 4W         | 8W       |
| +EPC vs. BMSC vs. CTR <sup>a</sup> | 0.330715       | 0.200221 | 0.000003   | 0.000001 |
| +EPC vs. BMSC <sup>b</sup>         | 0.383129       | 0.766459 | 0.000019   | 0.000016 |
| +EPC vs. CTR <sup>b</sup>          | 0.998692       | 0.182569 | 0.000004   | 0.000001 |
| BMSC vs. CTR <sup>b</sup>          | 0.406618       | 0.462653 | 0.203214   | 0.019819 |

<sup>a</sup> Data are analyzed by the one way ANOVA<sup>b</sup> Data are analyzed by tukey post-test**Table S3**

Area of fluorochromes stained bone (%)

|      | non-irradiated |            |            | Irradiated |            |            |
|------|----------------|------------|------------|------------|------------|------------|
|      | AL             | CA         | TE         | AL         | CA         | TE         |
| +EPC | 12.89±0.79     | 18.93±2.04 | 12.20±1.07 | 2.06±0.19  | 25.21±2.50 | 17.82±1.44 |
| BMSC | 13.03±1.38     | 21.34±1.34 | 14.36±1.34 | 2.04±0.15  | 13.18±0.49 | 15.57±1.65 |
| CTR  | 4.14±0.71      | 15.20±1.83 | 12.56±1.16 | 1.65±0.31  | 8.02±0.68  | 5.49±0.77  |

Results are expressed as mean ± SD and n = 3 per group

Alizarin Red S (AL), Calcein (CA), Tetracycline Hydrochloride (TE)

**Table S4**

P value of comparison of fluorochromes stained area

|                                    | non-irradiated |          |          | Irradiated |          |          |
|------------------------------------|----------------|----------|----------|------------|----------|----------|
|                                    | AL             | CA       | TE       | AL         | CA       | TE       |
| +EPC vs. BMSC vs. CTR <sup>a</sup> | 0.000052       | 0.058147 | 0.137048 | 0.113648   | 0.000024 | 0.000065 |
| +EPC vs. BMSC <sup>b</sup>         | 0.984276       | 0.495389 | 0.146907 | 0.991185   | 0.000171 | 0.179262 |
| +EPC vs. CTR <sup>b</sup>          | 0.000097       | 0.230939 | 0.929615 | 0.140565   | 0.000022 | 0.000073 |
| BMSC vs. CTR <sup>b</sup>          | 0.000089       | 0.050717 | 0.233282 | 0.165215   | 0.014131 | 0.000231 |

<sup>a</sup> Data are analyzed by the one way ANOVA<sup>b</sup> Data are analyzed by tukey post-test

Alizarin Red S (AL), Calcein (CA), Tetracycline Hydrochloride (TE)
